# Supplementary material for: Typical within and between person variability in non-invasive ventilator derived variables among clinically stable, long-term users
Source: HighWire-hosted journal article supplement (doi:10.1136/bmjresp-2020-000824), 2021-03-01
Supplement: bmjresp-2020-000824supp001_data_supplement.pdf [file bmjresp-2020-000824supp001_data_supplement.pdf]

**Data Form 1      Completion of 2 months remote monitoring**

Patient Study ID: \_\_\_\_\_

Date: \_\_/\_\_/\_\_

**Machine Download performed**

**1. During the last two months, my symptoms (including sleep quality, sleepiness, shortness of breath, energy levels) have been:**

- Better than usual
- The same as usual
- Worse than usual

**2. During the last two months, my overall health has been:**

- Better than usual
- The same as usual
- Worse than usual

Comments:  
.....  
.....  
.....

**Visits to the doctor**

- Have you been to see your GP in the last 2 months    YES / NO
- How many visits have you had to your GP                                          -----
- If YES, when was this and why?

Details:  
.....  
.....  
.....

- Have you been to see a specialist in the last 2 months? YES / NO
- If so, how many visits have you had to a specialist -----
- If YES, when was this and why (include type of specialist)?

Details:

.....

.....

.....

**Hospital Visits**

- **Over the last 2 months have you:**  
gone to the emergency department of any hospital for treatment? YES / NO  
If so, how many times? .....
- Reason/s .....
- .....

been admitted as an inpatient to any hospital? YES / NO

If YES, how many times? .....

Reason/s .....

.....

**Other Health Care Contacts**

- **Over the last 2 months have you:**
    - been seen by any other health care professional eg home nursing,
    - physiotherapist, occupational therapist etc? YES / NO
- Who and for what reason/s? .....
- .....
- .....
